# Supplementary material for: Solution-processed Cu@Au nanowires for transparent conductive films and electromagnetic shielding
Source: Royal Society of Chemistry journal article supplement (doi:10.1039/d5ce00785b), 2025-01-01
Supplement: d5ce00785b1.pdf [file d5ce00785b1.pdf]

## Electronic Supplementary Information

### Solution-processed Cu@Au nanowires for transparent conductive films and electromagnetic shielding

Xinyu Wang<sup>a</sup>, Juan Xu<sup>\*ab</sup>, Ying Li<sup>a</sup>, Yuhao Zhang<sup>a</sup>, Xin Wu<sup>a</sup> and Caixia Kan<sup>\*ab</sup>

<sup>a</sup> College of Physics, Nanjing University of Aeronautics and Astronautics, Nanjing 211106, China. E-mail: xujuan@nuaa.edu.cn; cxkan@nuaa.edu.cn

<sup>b</sup> MIIT Key Laboratory of Aerospace Information Materials and Physics, Nanjing University of Aeronautics and Astronautics, Nanjing 211106, China.

#### Supplementary figures

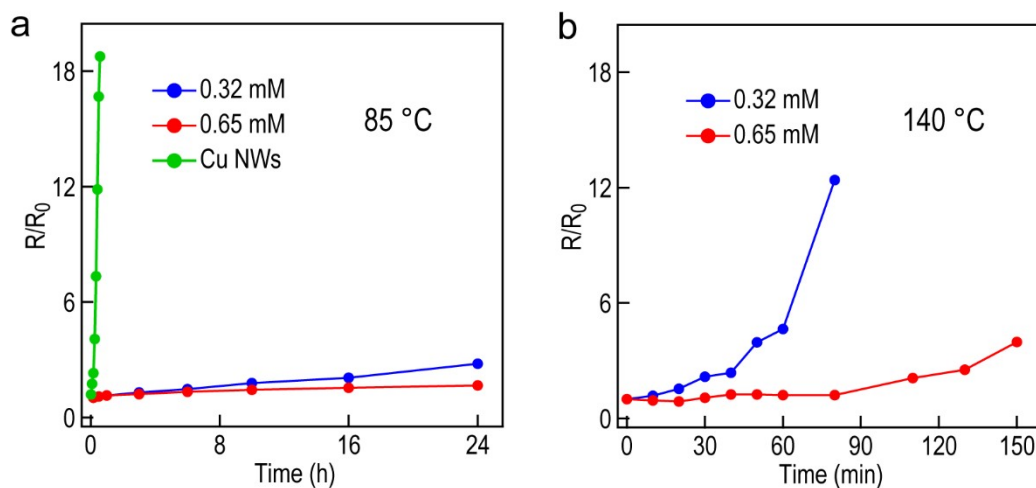

**Figure S1** Thermal stability of transparent conductive films (TCFs) based on Cu nanowires (NWs) treated with different concentrations of Au precursor solution (a) at 85 °C and (b) at 140 °C in ambient air.

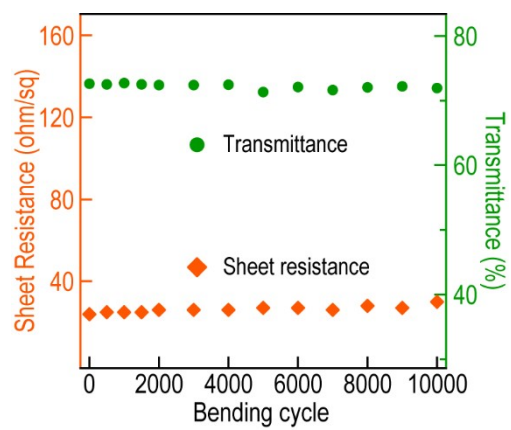

**Figure S2** Sheet resistance and optical transmittance for the Cu@Au NW/PLLA film after 10000 bending cycles under 180% strain.
